# Supplementary material for: Causes, consequences and implications of the 2023 landslide-induced Lake Rasac GLOF, Cordillera Huayhuash, Peru
Source: Copernicus journal article supplement (doi:10.5194/egusphere-2024-2316), 2024-08-27
Supplement: Supplementary file 1 [file egusphere-2024-2316-supplement.pdf]

# Causes, consequences and implications of the 2023 landslide-induced Lake Rasac GLOF, Cordillera Huayhuash, Peru

Adam Emmer<sup>1</sup>, Oscar Vilca<sup>2</sup>, Cesar Salazar Checa<sup>3</sup>, Sihan Li<sup>4</sup>, Simon Cook<sup>5</sup>, Elena Pummer<sup>6</sup>, Jan Hrebrina<sup>6</sup>, and Wilfried Haeberli<sup>7</sup>

<sup>1</sup>University of Graz, Austria

<sup>2</sup>Instituto Nacional de Investigación en Glaciares y Ecosistemas de Montaña (INAIGEM), Peru

<sup>3</sup>Autoridad Nacional del Agua (ANA), Peru;

<sup>4</sup>University of Sheffield, UK

10 <sup>5</sup>University of Dundee, UK

<sup>6</sup>Norwegian University of Science and Technology (NTNU), Norway

<sup>7</sup>University of Zurich, Switzerland

Correspondence to: Adam Emmer (adam.emmer@uni-graz.at OR aemmer@seznam.cz)

## 15 Supplementary figures:

Selected climate variables, averaged over the 1° by 1° box [-77.5, -76.5, -10.75, -9.75] covering Rasac, showing their seasonal cycles and historical trends.

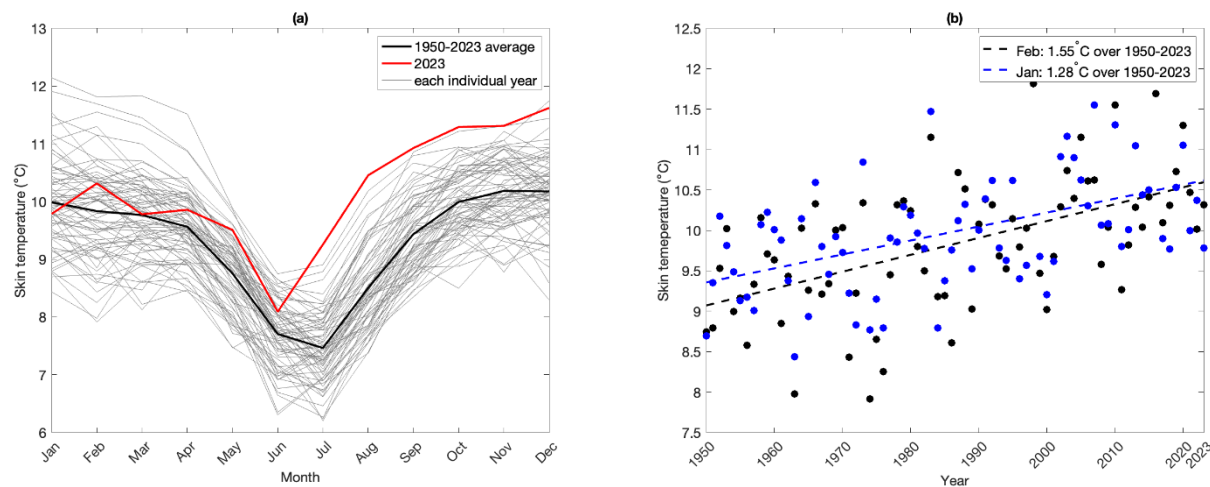

20 **Figure S1. Seasonal cycle of surface skin temperature (°C) for 1950-2023 shown in panel (a), and the historical trend for Feb and Jan shown in panel (b), with both Jan and Feb showing significant warming trend over the period analysed here.**

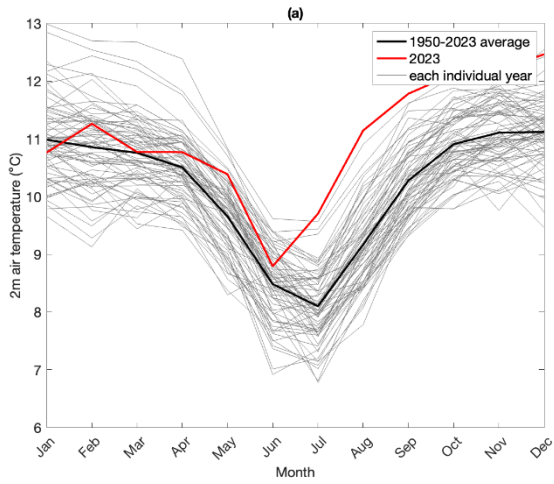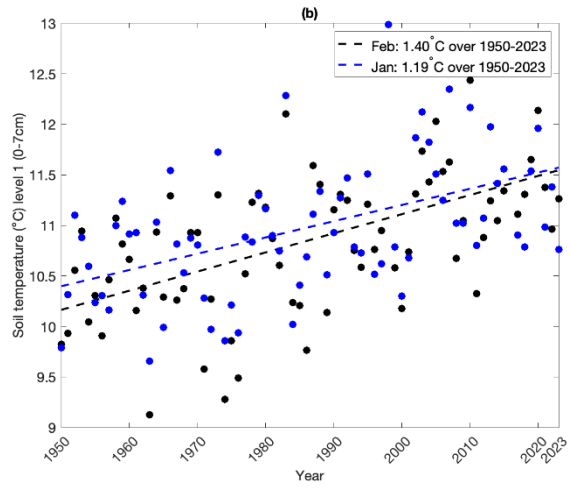

**Figure S2.** Seasonal cycle of soil temperature ( $^{\circ}\text{C}$ ) in layer 1 for 1950-2023 shown in panel (a), and the historical trend for Feb and Jan shown in panel (b), with both Jan and Feb showing significant warming trend over the period analysed here.

25

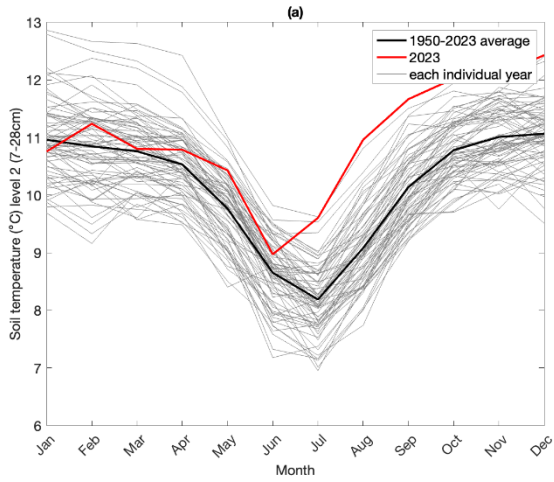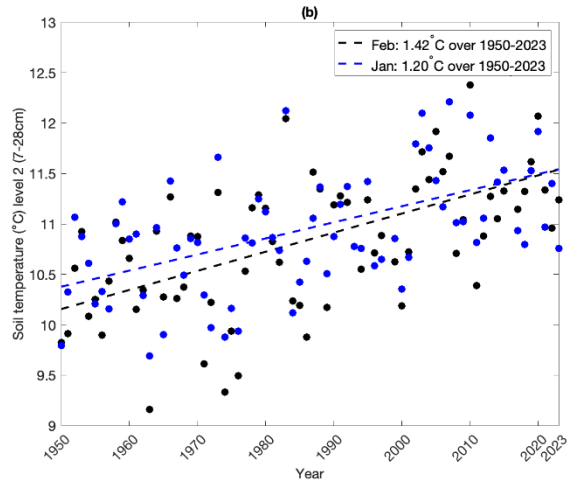

**Figure S3.** Seasonal cycle of soil temperature ( $^{\circ}\text{C}$ ) in layer 2 for 1950-2023 shown in panel (a), and the historical trend for Feb and Jan shown in panel (b) with both Jan and Feb showing significant warming trend over the period analysed here.

30

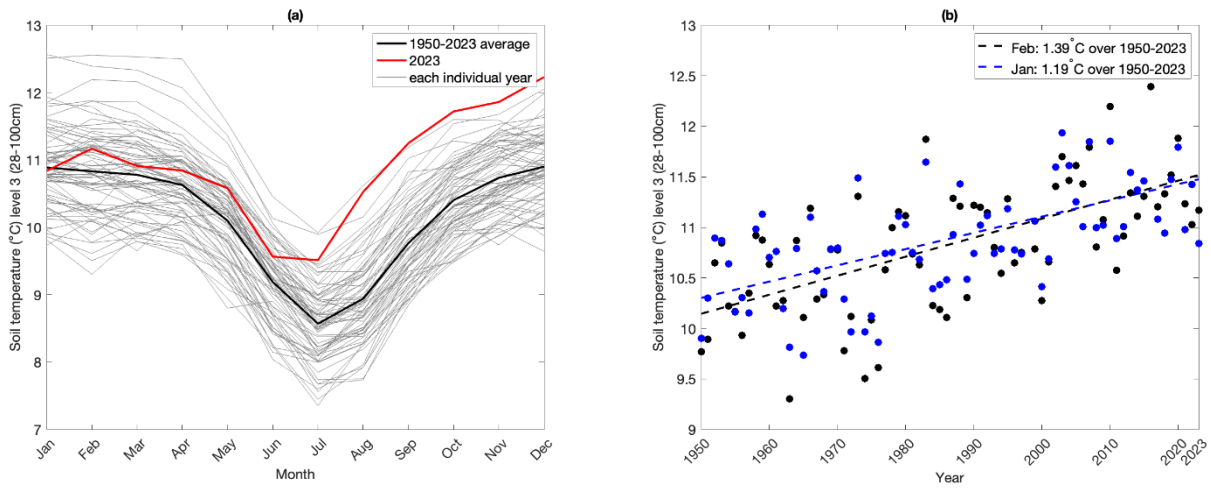

**Figure S4.** Seasonal cycle of soil temperature (°C) in layer 3 for 1950-2023 shown in panel (a), and the historical trend for Feb and Jan shown in panel (b), with both Jan and Feb showing significant warming trend over the period analysed here.

35

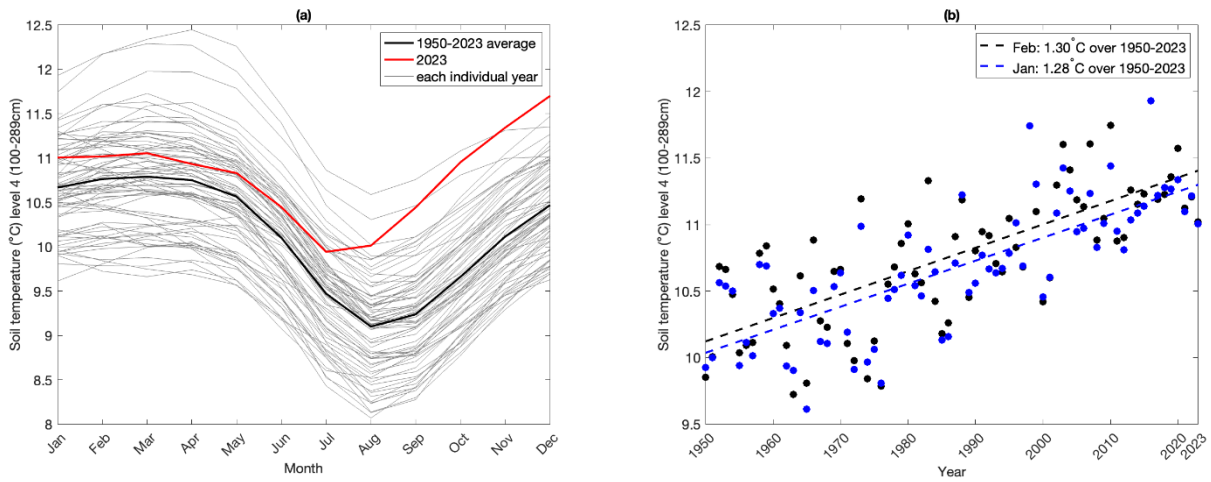

**Figure S5.** Seasonal cycle of soil temperature (°C) in layer 4 for 1950-2023 shown in panel (a), and the historical trend for Feb and Jan shown in panel (b), with both Jan and Feb showing significant warming trend over the period analysed here.

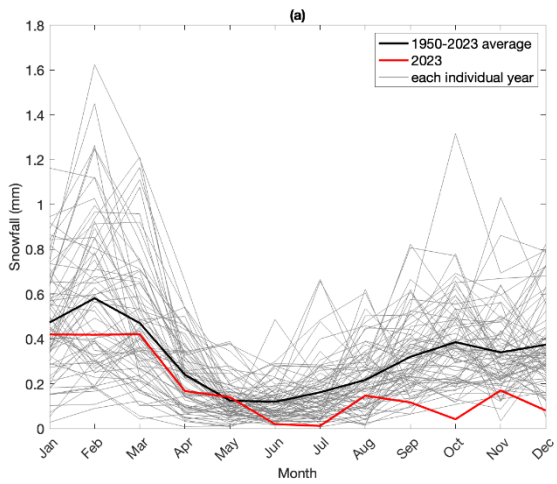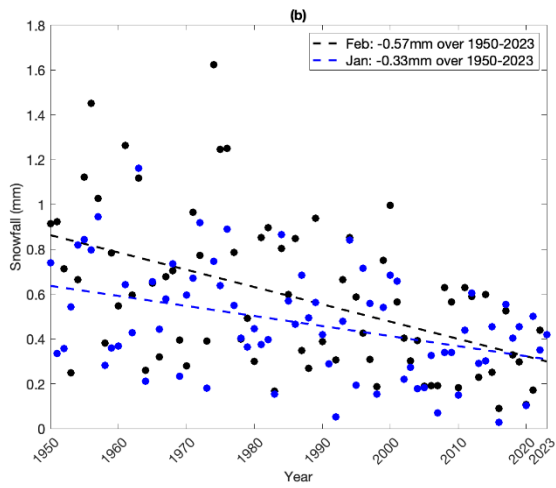

40 **Figure S6.** Seasonal cycle of snowfall (rainfall plus snowfall in mm/day) for 1950-2023 shown in panel (a), and the historical trend for Feb and Jan shown in panel (b), with both Jan and Feb showing significant decreasing trend over the period analysed here.

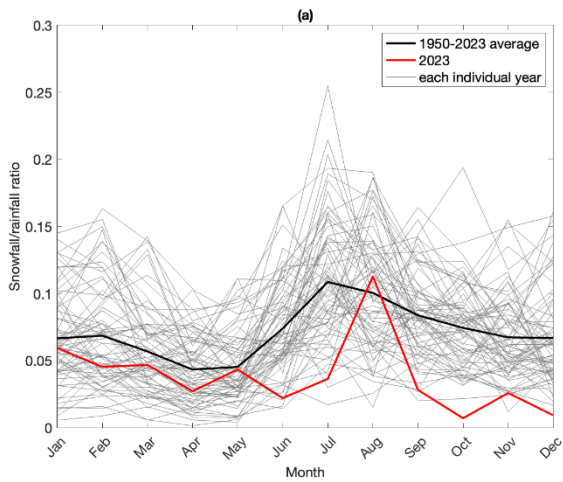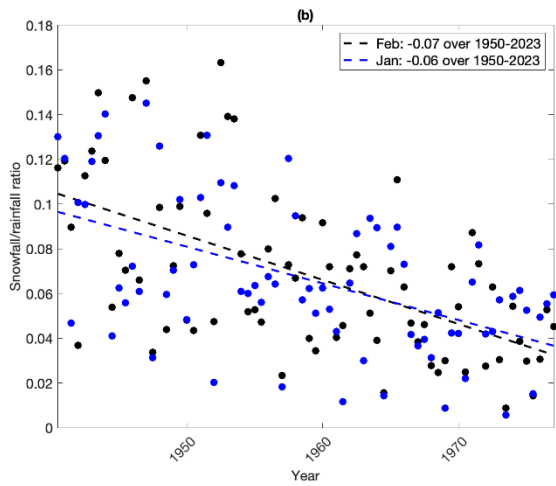

45 **Figure S7.** Seasonal cycle of snowfall to total rainfall ratio (unitless) for 1950-2023 shown in panel (a), and the historical trend for Feb and Jan shown in panel (b), with both Jan and Feb showing significant decreasing trend over the period analysed here.

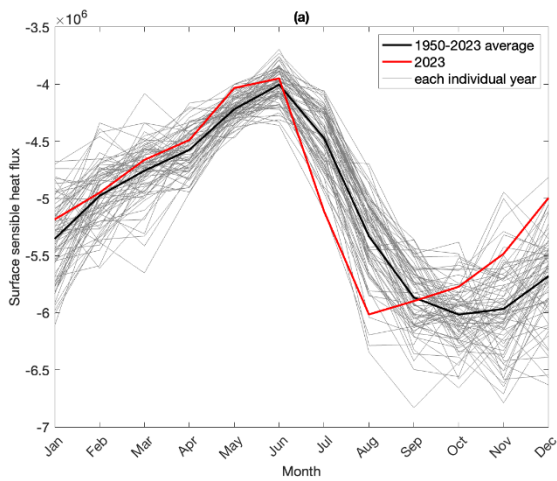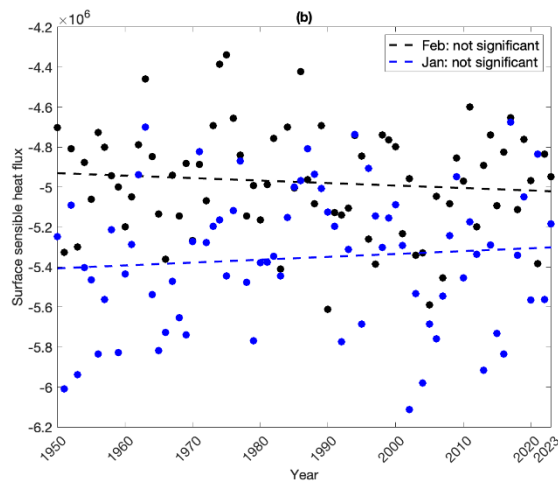

50 **Figure S8. Seasonal cycle of surface sensible heat flux ( $\text{J m}^{-2}$ , positive values are downwards) for 1950-2023 shown in panel (a), and the historical trend for Feb and Jan shown in panel (b), with no significant trend for neither Jan nor Feb.**

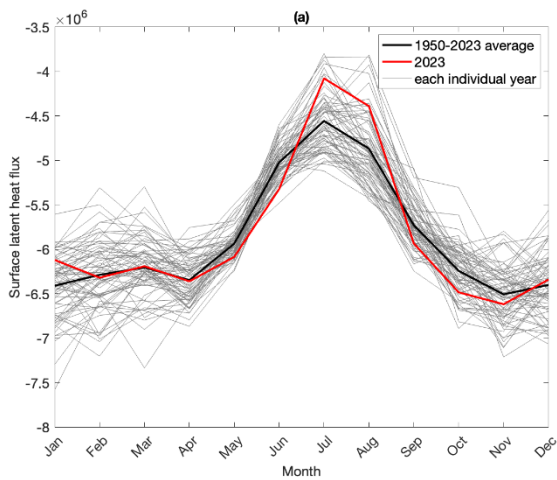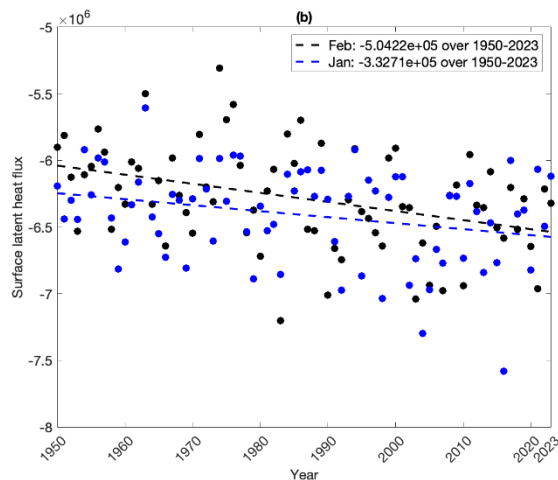

55 **Figure S9. Seasonal cycle of surface latent heat flux ( $\text{J m}^{-2}$ , positive values are downwards) for 1950-2023 shown in panel (a), and the historical trend for Feb and Jan shown in panel (b), with both Jan and Feb showing significant decreasing trend over the period analysed here.**
